# Supplementary material
Source: publisher site journal article supplement (https://www.dovepress.com/article/316711)
Supplement: Supplementary file 1 [file get_supplementary_file.php]

### Supplementary Table 2 Significant variants in Tibetan people compared with the 26 populations from 1000 genomes project by chi-squared test.

| SNP ID | Genes | EAS | | | | | AFR | | | | | | | AMR | | | | EUR | | | | | SAS | | | | |
| --- | --- | --- | --- | --- | --- | --- | --- | --- | --- | --- | --- | --- | --- | --- | --- | --- | --- | --- | --- | --- | --- | --- | --- | --- | --- | --- | --- |
| CDX | CHB | CHS | JPT | KHV | ACB | ASW | ESN | GWD | LWK | MSL | YRI | CLM | MXL | PEL | PUR | CEU | FIN | GBR | IBS | TSI | BEB | GIH | ITU | PJL | STU |
| rs11572325 | *CYP2J2* | 0.472858133 | 0.900497344 | 0.045302786 | 0.184470804 | 0.468348565 | 0.001171076 | 0.004297605 | 0.001566041 | 0.002088139 | 0.009725723 | 0.01578791 | 0.000410802 | 0.139527658 | 0.219802837 | 0.0986279 | 0.003468139 | 0.196537912 | 0.018375387 | 0.644897978 | 0.672058184 | 0.217763789 | 0.301246426 | 0.439710213 | 0.909471404 | 0.312210924 | 0.022450508 |
| rs10889160 | *CYP2J2* | 0.57702663 | 0.327837552 | 0.841946376 | 0.104067319 | 0.561510721 | 1.89487E-13 | 5.2208E-06 | 7.45745E-16 | 3.49876E-10 | 2.80914E-11 | 3.11172E-13 | 1.71841E-15 | 0.873954848 | 0.370507312 | 0.269527835 | 0.091129465 | 0.773332553 | 0.022946148 | 0.60006149 | 0.741558961 | 0.807872291 | 0.115777147 | 0.003673036 | 0.011878813 | 0.267758216 | 0.192164373 |
| rs890293 | *CYP2J2* |  | 2.15641E-13 |  |  |  | 4.80884E-07 | 1.47272E-05 | 0.000347338 | 6.64102E-06 | 6.75296E-05 | 0.007941374 | 1.21501E-06 |  |  |  | 2.80398E-11 |  | 3.97441E-10 | 8.42222E-12 |  |  |  |  | 1.47823E-11 |  |  |
| rs1760217 | *DPYD* | 0.860361121 | 0.135571973 | 0.001674728 | 0.863992383 | 0.012178263 | 1.42872E-05 | 0.009790606 | 0.001916959 | 7.71544E-08 | 1.6619E-05 | 0.000732141 | 6.82222E-07 | 3.18672E-06 | 0.186216294 | 0.000131545 | 1.35279E-08 | 0.007278671 | 1.96687E-07 | 6.42699E-07 | 1.76953E-06 | 5.50375E-06 | 9.69921E-05 | 0.00137854 | 1.35782E-11 | 1.13366E-07 | 8.80256E-11 |
| rs1801159 | *DPYD* | 0.175065453 | 0.258654215 | 0.098916165 | 0.486218367 | 0.176666966 | 0.054974326 | 0.240161961 | 0.622775389 | 8.6155E-05 | 0.057020814 | 0.00019772 | 0.114607611 | 0.420159764 | 0.520145199 | 5.66067E-08 | 0.796211956 | 0.125512733 | 0.086653926 | 0.437999712 | 0.99150777 | 0.444476228 | 0.004282212 | 0.002154396 | 1.8187E-06 | 0.001490665 | 3.7502E-05 |
| rs1801158 | *DPYD* |  |  |  |  |  |  |  |  |  |  |  |  |  |  |  |  |  |  |  | 0.000137356 |  |  |  |  |  |  |
| rs1801265 | *DPYD* | 0.853286921 | 0.055239452 | 0.066974181 | 0.022565814 | 0.200220866 | 4.75841E-10 | 1.33473E-13 | 5.15841E-14 | 1.06505E-16 | 3.43274E-17 | 5.56932E-10 | 4.64594E-15 | 0.00153376 | 0.021979697 | 0.586881365 | 0.00029471 | 0.657841073 | 3.89163E-06 | 0.112669492 | 0.014246097 | 0.031811428 | 0.061241254 | 1.84187E-08 | 9.58394E-07 | 1.3247E-05 | 0.052717717 |
| rs5275 | *PTGS2* | 0.426860351 | 0.011755029 | 0.076203091 | 0.273150917 | 0.24870971 | 4.84612E-15 | 1.94089E-09 | 6.33758E-19 | 3.44653E-14 | 4.10023E-15 | 1.62896E-17 | 2.88815E-19 | 0.002853019 | 0.072508801 | 0.000620943 | 0.110211361 | 0.001228147 | 0.881617876 | 0.510895273 | 0.06785157 | 0.37643762 | 0.003667868 | 0.002633189 | 0.015225952 | 2.1661E-06 | 0.000566156 |
| rs20417 | *PTGS2* |  |  |  |  |  | 3.27865E-24 | 5.79013E-21 | 1.1857E-32 | 8.53615E-23 | 1.07547E-19 | 5.60648E-31 | 3.13529E-28 | 7.18664E-15 | 4.76497E-14 | 1.56741E-12 | 3.16485E-14 | 7.32387E-11 | 1.11804E-05 | 3.0294E-08 | 2.13613E-09 | 2.94016E-12 | 4.41979E-11 | 2.99288E-11 | 1.61722E-10 | 4.05769E-15 | 1.5945E-13 |
| rs12139527 | *CACNA1S* | 0.474879805 | 0.186842188 | 0.2920915 | 0.143250195 | 0.186339041 | 7.3833E-28 | 1.32219E-23 | 9.6748E-36 | 4.94435E-38 | 1.52121E-30 | 6.549E-35 | 3.34367E-35 | 0.131021704 | 0.128098196 | 0.635985535 | 0.000224364 | 0.189025574 | 0.277785984 | 0.367702046 | 0.240627237 | 0.761583199 | 0.224857442 | 0.062288221 | 0.303947296 | 0.775243697 | 0.816599883 |
| rs13374149 | *CACNA1S* |  |  |  |  |  | 2.99972E-20 | 1.09754E-15 | 4.47763E-25 | 1.39783E-25 | 7.29371E-18 | 2.19178E-27 | 2.46132E-29 | 0.000207598 |  |  |  |  | 0.033229704 |  |  | 0.000280642 |  |  |  |  | 0.00308051 |
| rs3850625 | *CACNA1S* |  |  |  |  |  |  |  |  |  |  |  |  | 0.000228879 |  | 0.00109252 |  | 0.011583658 | 2.82593E-09 | 3.64889E-06 | 0.006775973 | 0.000871196 | 1.5345E-06 | 1.77336E-17 | 1.22044E-10 | 2.29285E-09 | 2.7568E-07 |
| rs12742169 | *CACNA1S* |  |  |  |  |  |  | 0.000996246 |  |  |  |  |  | 1.91241E-10 | 5.80599E-05 |  | 3.83211E-18 | 5.42543E-22 | 7.15629E-10 | 3.00017E-23 | 2.73788E-17 | 7.59219E-21 | 0.020376092 | 0.004162923 | 2.13333E-05 | 0.000155142 | 0.07838486 |
| rs12406479 | *CACNA1S* |  |  |  |  |  |  |  |  |  |  |  |  |  |  |  |  | 0.001431413 |  |  |  |  |  |  |  | 1.45641E-05 | 0.012592012 |
| rs2306238 | *RYR2* | 0.087625194 | 0.227919133 | 0.704018832 | 0.596812708 | 0.206419136 | 3.15663E-07 | 0.000328718 | 5.94947E-10 | 8.19264E-09 | 5.6456E-08 | 6.07875E-09 | 2.64776E-08 | 0.139869605 | 0.027116617 | 0.00763276 | 0.185202904 | 0.273415063 | 0.530769114 | 0.932684374 | 0.706910986 | 0.66782441 | 0.594389416 | 0.89765885 | 0.051834555 | 0.086789896 | 0.049568947 |
| rs2231142 | *ABCG2* | 2.19724E-06 | 1.76731E-12 | 6.10637E-09 | 1.56704E-14 | 1.66876E-15 |  |  |  |  |  |  |  |  | 5.89182E-05 | 0.009103922 | 0.208208058 | 0.11763227 | 0.333279467 | 0.008418977 |  | 0.233568639 | 0.084251468 |  |  |  | 0.356652205 |
| rs2231137 | *ABCG2* | 0.550085427 | 0.012949411 | 0.300445575 | 1.4481E-07 | 0.784163876 | 8.27856E-17 | 2.96479E-14 | 5.80704E-17 | 5.22098E-20 | 7.91206E-11 | 9.15485E-12 | 2.1273E-17 | 1.51332E-08 | 0.000890254 | 0.329167881 | 8.33083E-09 | 8.29538E-19 | 7.77526E-13 | 5.22359E-18 | 8.63994E-18 | 1.01386E-14 | 0.000725221 | 5.77823E-09 | 2.15305E-12 | 1.36943E-11 | 6.39537E-06 |
| rs698 | *ADH1C* | 0.255972886 | 0.023330168 | 0.194554981 | 0.20665681 | 0.218058002 | 0.930453198 | 0.872794485 | 0.197631043 | 0.217318566 | 0.272567465 | 0.33349012 | 0.114913814 | 0.001643427 | 6.88491E-05 | 0.104503767 | 2.63823E-11 | 1.34116E-18 | 5.47685E-19 | 6.20301E-14 | 8.22186E-07 | 3.5277E-07 | 0.075370147 | 1.95256E-05 | 0.00088097 | 3.44388E-08 | 3.98621E-09 |
| rs776746 | *CYP3A5* | 0.001000913 | 0.002241123 | 0.014862602 | 0.0026758 | 0.001902199 | 9.22545E-29 | 4.11415E-20 | 5.87345E-41 | 1.03974E-32 | 1.43768E-39 | 2.66952E-37 | 1.11517E-37 | 0.61546994 | 0.112593227 | 0.275641301 | 0.087291451 | 6.79643E-05 | 0.001090913 | 0.00096165 | 0.004438479 | 0.000209366 | 1.94069E-05 | 0.004811938 | 0.000312821 | 4.06731E-05 | 0.000147841 |
| rs2242480 | *CYP3A4* | 0.441843507 | 0.783933354 | 0.94004699 | 0.176670922 | 0.069143129 | 1.40641E-29 | 5.22434E-21 | 4.81047E-41 | 1.67368E-34 | 2.69779E-41 | 1.46326E-37 | 3.83349E-36 | 0.267265511 | 0.001942631 | 4.49886E-13 | 0.009882368 | 1.65115E-06 | 3.46632E-05 | 3.24385E-05 | 0.002961187 | 7.9357E-05 | 0.002452831 | 0.019567712 | 0.001273333 | 5.13527E-05 | 0.001929402 |
| rs1805123 | *KCNH2* |  | 8.41816E-62 |  |  |  |  |  |  |  |  |  |  | 9.01083E-38 | 1.57925E-38 |  | 2.64164E-37 | 2.71112E-32 | 8.04783E-41 | 8.46425E-37 | 3.52574E-36 | 1.52042E-33 | 7.44099E-30 | 4.14597E-39 | 2.84139E-33 | 3.31317E-36 | 2.64521E-35 |
| rs4646244 | *NAT2* | 0.270412879 | 0.738268541 | 0.181232537 | 0.050440253 | 0.000191079 | 0.196130593 | 0.196085542 | 0.130668079 | 0.711166734 | 0.540012775 | 0.154492616 | 0.857607095 | 0.220107729 | 0.092593019 | 0.002053679 | 0.73065546 | 0.00199203 | 0.070634937 | 0.008011432 | 0.028172494 | 0.082769202 | 0.157958665 | 3.21155E-05 | 0.000340959 | 0.000461682 | 1.35016E-06 |
| rs4271002 | *NAT2* | 0.002039768 | 0.721300122 | 0.129173045 | 0.088216923 | 0.292432583 | 0.000948546 | 0.02640332 | 7.59061E-09 | 1.08877E-08 | 0.000275124 | 0.002406023 | 6.75381E-05 | 0.001124734 | 0.569031139 | 0.007434693 | 0.222746572 | 2.70843E-05 | 0.009198287 | 0.138060093 | 0.050055356 | 0.090574766 | 0.873318911 | 0.033854416 | 0.003185478 | 0.034244531 | 0.024853689 |
| rs1041983 | *NAT2* | 0.181440723 | 0.290954544 | 0.457355298 | 0.425383019 | 0.018833085 | 0.17442741 | 0.656919544 | 0.035252143 | 0.696847798 | 0.709453529 | 0.133781339 | 0.142708555 | 0.15577873 | 0.021359828 | 0.002282167 | 0.035656742 | 0.043523 | 0.007396601 | 0.041131279 | 0.146849038 | 0.02851659 | 0.499547192 | 0.618192207 | 0.970785511 | 0.927895588 | 0.103241498 |
| rs1801280 | *NAT2* |  |  |  |  | 0.218580855 | 2.48516E-16 | 2.47312E-16 | 1.1507E-16 | 2.16016E-21 | 1.55792E-24 | 2.60739E-13 | 1.72235E-13 | 7.57323E-24 | 3.18016E-21 | 1.78722E-17 | 1.30054E-24 | 4.31093E-28 | 3.13515E-30 | 6.48074E-30 | 2.72655E-33 | 3.06385E-29 | 1.30359E-21 | 3.77039E-21 | 1.88689E-22 | 1.03338E-27 | 1.18645E-17 |
| rs1799929 | *NAT2* |  |  |  |  | 0.245881169 | 1.46064E-13 | 1.42949E-13 | 4.03587E-11 | 1.46282E-18 | 5.41115E-22 | 3.21753E-10 | 3.80143E-08 | 4.31191E-23 | 5.5708E-21 | 2.28729E-17 | 3.40855E-22 | 1.2603E-28 | 2.2822E-29 | 5.38439E-29 | 7.74168E-34 | 7.56286E-30 | 7.29975E-21 | 3.2248E-19 | 3.8117E-21 | 5.69425E-25 | 4.12945E-17 |
| rs1799930 | *NAT2* | 0.920020237 | 0.68156321 | 0.591497573 | 0.776301519 | 0.013660603 | 0.55361161 | 0.124626889 | 0.713220017 | 0.438410413 | 0.289938201 | 0.910305866 | 0.557008003 | 0.958652827 | 0.068114514 | 0.00029987 | 0.780249994 | 0.147989411 | 0.143163974 | 0.280232678 | 0.254359868 | 0.398623115 | 0.551410525 | 0.00052202 | 0.01768716 | 0.002993603 | 1.13616E-05 |
| rs1208 | *NAT2* |  |  |  |  | 0.155574978 | 3.58216E-23 | 9.42218E-20 | 8.71066E-25 | 2.21084E-30 | 2.84153E-30 | 9.5853E-22 | 5.27735E-25 | 1.73604E-24 | 1.1058E-25 | 1.78722E-17 | 1.44845E-24 | 1.17369E-26 | 3.9072E-28 | 1.88604E-28 | 2.52644E-33 | 6.99599E-30 | 2.29804E-24 | 3.77039E-21 | 3.7991E-22 | 1.96753E-28 | 6.65833E-20 |
| rs1799931 | *NAT2* | 0.043686082 | 0.156930105 | 0.62215967 | 0.002514977 | 0.950806979 | 1.01676E-06 | 0.000425425 | 4.67772E-09 | 9.86959E-10 | 1.20097E-09 | 2.42855E-05 | 2.83023E-07 | 0.000210996 | 0.224093073 | 0.025175829 | 0.00079909 | 2.87511E-10 | 5.62997E-07 | 8.87809E-08 | 1.17296E-07 | 3.32524E-09 | 0.012835388 | 1.29176E-05 | 3.61215E-05 | 4.59841E-05 | 0.000546672 |
| rs1495741 | *NAT2* | 0.029487568 | 0.57567818 | 0.27365473 | 0.404774075 | 0.00241601 | 0.001961112 | 7.82459E-05 | 0.021411158 | 0.007557559 | 7.00475E-06 | 0.044239411 | 0.161361508 | 3.59769E-08 | 6.84277E-05 | 0.074214262 | 4.4745E-07 | 2.93605E-09 | 4.48684E-11 | 2.63808E-11 | 6.4931E-15 | 1.47611E-09 | 7.88909E-09 | 5.56893E-13 | 8.6988E-11 | 7.88606E-16 | 2.70683E-14 |
| rs2115819 | *ALOX5* | 0.263046609 | 0.006097157 | 0.66102389 | 0.063962713 | 0.426057358 | 1.53445E-36 | 2.18414E-24 | 2.23256E-36 | 1.66715E-39 | 9.83049E-31 | 8.21572E-31 | 8.39599E-40 | 7.73052E-14 | 1.05863E-09 | 0.00052077 | 1.89979E-12 | 4.97895E-21 | 2.17548E-16 | 1.19409E-16 | 4.78707E-17 | 1.71234E-17 | 2.04589E-13 | 2.77692E-19 | 8.57688E-17 | 4.1652E-13 | 3.7599E-10 |
| rs12248560 | *CYP2C19* |  |  |  |  |  | 1.54627E-20 | 7.98797E-13 | 1.51205E-17 | 1.74497E-17 | 1.21486E-11 | 2.72723E-18 | 6.60714E-17 | 9.44547E-08 | 1.46996E-05 |  | 6.06566E-12 | 2.21756E-16 | 2.6124E-15 | 6.59699E-17 | 1.77146E-15 | 1.62686E-15 |  |  | 1.94473E-08 | 1.37333E-08 | 4.87882E-08 |
| rs4244285 | *CYP2C19* | 0.84706357 | 0.034488619 | 0.008871185 | 0.060203707 | 0.484074664 | 0.027925803 | 0.036999796 | 0.312308386 | 0.001410082 | 0.398224151 | 0.130687923 | 0.016267561 | 0.000317476 | 0.01076646 | 6.414E-07 | 0.00225392 | 0.003151235 | 0.608267995 | 0.016827904 | 0.007995554 | 1.716E-05 | 0.047506895 | 0.006110469 | 0.001514462 | 0.001358387 | 4.36121E-05 |
| rs1057910 | *CYP2C9* | 0.195428666 | 0.454473052 | 0.515315431 | 0.062850826 | 0.373561639 | 0.006470751 | 0.135452977 | 0.001567301 | 0.000647077 | 0.001567301 | 0.003814424 | 0.000887053 | 0.75564763 | 0.235321508 | 0.034642868 | 0.567656787 | 0.722152699 | 0.775019911 | 0.642506481 | 0.332638357 | 0.613228604 | 0.032412349 | 0.013188292 | 0.205923827 | 0.289940449 | 0.129617082 |
| rs11572103 | *CYP2C8* |  |  |  |  |  | 8.77779E-12 | 7.41329E-06 | 2.33547E-10 | 5.68477E-14 | 1.33332E-05 | 7.69555E-08 | 3.29991E-10 |  |  |  |  |  |  |  |  |  |  |  |  |  |  |
| rs7909236 | *CYP2C8* | 0.098542587 | 0.072024173 | 0.001514494 | 0.00319775 | 9.97262E-05 | 2.15499E-05 | 0.051091061 | 2.34266E-09 | 1.84653E-10 | 1.46399E-07 | 3.09684E-08 | 4.55569E-10 | 0.001853426 | 0.007606732 | 7.20349E-06 | 0.510451406 | 0.025171021 | 0.013620704 | 0.309238609 | 0.873343343 | 0.97648594 | 0.195914007 | 0.134254608 | 0.423597122 | 0.279504562 | 0.321628668 |
| rs17110453 | *CYP2C8* | 0.624883315 | 0.004427669 | 0.000492128 | 6.38845E-05 | 0.437732747 | 3.68281E-10 | 3.15955E-07 | 1.87427E-10 | 4.0833E-13 | 9.53224E-12 | 2.37282E-10 | 5.80297E-12 | 0.00109711 | 0.028423556 | 5.63218E-06 | 0.006600971 | 0.000477775 | 0.727063596 | 0.003077505 | 0.654791373 | 0.002036056 | 0.028320155 | 0.025301331 | 0.012567147 | 0.29051361 | 0.001260846 |
| rs3813867 | *CYP2E1* | 0.000694508 | 6.60362E-08 | 4.939E-06 | 9.97222E-06 | 2.77541E-07 | 0.240091239 |  |  |  |  | 0.266351034 | 0.353019903 | 0.025014677 | 0.00333327 | 0.000594733 |  |  | 0.072024581 |  |  |  |  |  |  |  |  |
| rs2031920 | *CYP2E1* | 0.405565586 | 0.000466023 | 0.04471774 | 0.162585576 | 0.048972397 | 8.98608E-08 | 0.000319537 | 5.62467E-08 | 6.42721E-09 | 5.62467E-08 | 5.07064E-07 | 1.39038E-08 | 0.441540869 | 0.905268607 | 0.678986021 | 0.00537089 | 0.009453974 | 0.000158727 | 9.22871E-05 | 9.31029E-06 | 0.001920084 | 6.42139E-06 | 4.79003E-07 | 5.57345E-07 | 1.38731E-06 | 1.46403E-07 |
| rs6413432 | *CYP2E1* | 6.34908E-26 | 1.05938E-22 | 1.12319E-21 | 1.80735E-22 | 3.8156E-26 |  |  | 2.62313E-07 | 1.40153E-08 |  | 3.64059E-05 | 1.64304E-08 | 7.88688E-16 | 2.51481E-14 | 2.09169E-14 | 8.48529E-15 | 7.97618E-12 | 2.72477E-10 | 2.2828E-06 | 8.9443E-07 | 1.61735E-09 | 5.68224E-18 | 7.09375E-24 | 8.51582E-18 | 2.79793E-13 | 2.38413E-18 |
| rs2070676 | *CYP2E1* | 0.026223786 | 0.290931508 | 0.678633085 | 0.462305699 | 0.061862555 | 2.34564E-25 | 1.95368E-13 | 1.58722E-24 | 4.96483E-26 | 1.15498E-30 | 3.83601E-26 | 5.66382E-24 | 0.069124129 | 0.267135302 | 0.09588914 | 0.025440036 | 0.071338029 | 0.004091546 | 0.020268345 | 0.230716198 | 0.053866344 | 0.584171517 | 0.299084215 | 0.705879393 | 0.487954898 | 0.862386376 |
| rs5219 | *KCNJ11* | 0.021677285 | 0.000114849 | 0.012987726 | 0.012663592 | 0.015357079 | 2.76128E-14 | 4.43426E-06 | 2.52704E-22 | 3.98914E-23 | 1.50588E-21 | 6.51665E-20 | 7.91775E-24 | 0.000459932 | 0.005172226 | 0.223558052 | 0.00211632 | 0.039387835 | 0.000272282 | 0.109631052 | 0.001787631 | 0.006921618 | 5.12344E-05 | 3.75653E-05 | 0.00050486 | 4.20182E-08 | 0.019180375 |
| rs1801028 | *DRD2* |  | 0.131914854 | 0.124336406 |  |  |  |  |  |  |  |  |  |  |  |  |  |  |  |  |  |  |  | 0.001442622 |  |  | 0.136453715 |
| rs2306283 | *SLCO1B1* | 0.057029728 | 0.173394954 | 0.132097165 | 0.095440872 | 0.355016287 | 0.27393221 | 0.648575747 | 3.93332E-05 | 0.007791085 | 0.00043881 | 0.096979377 | 0.039088834 | 2.97352E-09 | 5.55986E-13 | 7.40047E-09 | 1.90047E-07 | 7.70507E-14 | 1.79512E-11 | 1.5058E-16 | 1.82356E-13 | 1.75077E-15 | 4.06643E-05 | 1.47419E-05 | 0.000550724 | 2.97483E-10 | 4.0816E-05 |
| rs4516035 | *VDR* |  |  |  |  |  |  | 0.190067569 |  |  |  |  |  | 6.96602E-09 | 1.24714E-06 | 4.53929E-05 | 4.00523E-13 | 3.29129E-14 | 9.98729E-26 | 2.13357E-16 | 8.17091E-16 | 2.2564E-18 | 0.007156959 | 0.0014686 | 0.00077145 | 4.82918E-06 | 7.56237E-05 |
| rs2472297 | *CYP1A2* |  |  |  |  |  |  |  |  |  |  |  |  | 1.13146E-06 | 8.79691E-07 |  |  | 7.51314E-22 | 4.73318E-23 | 2.79488E-29 | 2.2449E-14 | 1.37089E-08 |  |  |  |  |  |
| rs762551 | *CYP1A2* | 0.013786707 | 0.831467044 | 0.29853597 | 0.520962826 | 0.014402392 | 0.999824145 | 0.414860141 | 0.044308552 | 0.455394576 | 0.001998014 | 0.119377073 | 0.080639131 | 0.061535556 | 0.065373286 | 1.00542E-06 | 0.089000866 | 0.068978601 | 0.345869937 | 0.078243376 | 0.772599501 | 0.680330175 | 0.365993318 | 0.043348501 | 0.143815847 | 0.083631578 | 0.011236312 |
| rs2472304 | *CYP1A2* | 0.000273172 | 0.05292499 | 4.84544E-05 | 9.39402E-08 | 3.66798E-05 | 0.318946014 | 0.007704173 | 0.009484564 | 0.067792878 | 0.062125873 | 0.020564938 | 0.016570146 | 2.7055E-19 | 1.09312E-08 | 0.04381332 | 1.55333E-28 | 7.72424E-40 | 2.39908E-32 | 1.98967E-37 | 2.59533E-37 | 1.52426E-30 | 1.78419E-05 | 0.004232694 | 0.014162285 | 1.39945E-07 | 0.078594172 |
| rs750155 | *SULT1A1* | 0.000220618 | 3.25993E-09 | 0.001035067 | 3.90893E-08 | 0.002303351 | 2.51396E-06 | 3.86443E-07 | 4.41335E-14 | 7.2882E-14 | 2.09403E-07 | 8.01098E-06 | 7.19801E-10 | 5.79333E-08 | 9.30999E-06 | 1.00965E-27 | 1.40166E-10 | 1.45972E-06 | 0.000489179 | 5.51019E-07 | 1.20882E-05 | 1.02583E-07 | 1.7291E-13 | 1.86768E-13 | 7.47569E-13 | 3.05484E-10 | 2.18246E-20 |
| rs1800764 | *ACE* | 0.582907236 | 0.067591945 | 0.109583572 | 0.354028194 | 0.251183391 | 1.5881E-20 | 5.95234E-12 | 3.04916E-27 | 1.4056E-32 | 1.18792E-22 | 1.02264E-29 | 4.85391E-32 | 0.52016586 | 0.143898568 | 0.000222585 | 0.315275303 | 0.366989253 | 0.194760344 | 0.866025948 | 0.559689601 | 0.092626054 | 0.780353148 | 0.299931731 | 0.988649975 | 0.829938653 | 0.422437716 |
| rs4291 | *ACE* | 2.6633E-29 | 1.07908E-34 | 4.49253E-30 | 2.00829E-25 | 4.18999E-34 | 1.14277E-27 | 2.3969E-28 | 2.29665E-29 | 6.10765E-25 | 4.20939E-34 | 6.38544E-25 | 2.97258E-34 | 2.71998E-28 | 1.76608E-33 | 4.85759E-41 | 7.35446E-28 | 2.28294E-29 | 1.15652E-23 | 1.08052E-30 | 4.98282E-27 | 4.25611E-30 | 3.75792E-28 | 6.57585E-27 | 2.22725E-34 | 5.37045E-29 | 8.20981E-28 |
| rs4267385 | *ACE* | 0.003314343 | 0.060739837 | 0.043267936 | 0.27606284 | 0.001877023 | 1.28666E-34 | 3.51184E-24 | 5.2026E-36 | 1.91452E-41 | 6.99848E-43 | 2.31651E-39 | 5.81525E-40 | 8.91721E-13 | 4.00681E-09 | 0.021299768 | 1.28589E-17 | 6.52452E-19 | 6.57125E-18 | 2.45835E-20 | 1.2687E-21 | 4.77433E-31 | 0.000515995 | 1.49544E-09 | 5.08452E-05 | 1.01396E-09 | 6.16108E-08 |
| rs2108622 | *CYP4F2* | 0.206066251 | 0.321801808 | 0.147517069 | 0.359946179 | 0.597502639 | 0.000342686 | 0.000755803 | 4.57488E-09 | 1.15954E-07 | 0.000313103 | 0.000447196 | 1.38519E-08 | 0.75724927 | 0.218111314 | 0.00115964 | 0.629798434 | 0.942851493 | 0.355142569 | 0.779888174 | 0.014420594 | 0.119408624 | 0.0014536 | 0.000140245 | 0.003224127 | 0.006564698 | 0.000625819 |
| rs3093105 | *CYP4F2* | 0.04690962 | 0.359587527 | 0.167170906 | 0.025804648 | 0.007941321 | 0.000538199 | 0.000517103 | 0.000130587 | 0.010337988 | 0.02722685 | 1.93734E-05 | 2.13371E-06 | 0.604356097 | 0.633926701 | 0.057686315 | 0.021226864 | 0.591142488 | 0.901966166 | 0.126374595 | 8.94683E-05 | 0.00068788 | 0.769510851 | 0.336677 | 0.100437956 | 0.328098428 | 0.77923482 |
| rs8192726 | *CYP2A6* | 0.344137192 | 0.432033584 | 0.540365182 | 0.385574291 | 0.42815015 | 0.028798144 | 0.459018027 | 0.219389955 | 0.016775386 | 0.184972481 | 0.040007702 | 0.379304832 | 0.001763762 | 0.025530477 | 0.009174807 | 0.002329752 | 0.00697073 | 0.054781593 | 0.003620904 | 0.005480105 | 0.020352685 | 0.665189411 | 0.432757182 | 0.60897751 | 0.675561686 | 0.60897751 |
| rs1051298 | *SLC19A1* | 6.37857E-05 | 9.84052E-08 | 0.012648807 | 2.11524E-05 | 0.003207201 | 0.000657657 | 7.3731E-05 | 1.5465E-05 | 6.0647E-06 | 1.46494E-06 | 0.00028787 | 0.000120035 | 3.18821E-08 | 2.07213E-15 | 7.15633E-14 | 1.13228E-08 | 1.08639E-11 | 9.86938E-09 | 2.48978E-13 | 3.55664E-08 | 3.35112E-10 | 0.00022729 | 0.000149879 | 2.49815E-05 | 3.69941E-06 | 3.69541E-06 |
| rs1051296 | *SLC19A1* | 4.67886E-07 | 3.62768E-10 | 0.000427316 | 3.72508E-08 | 2.97797E-06 | 6.68021E-06 | 1.95195E-09 | 3.108E-10 | 6.8052E-10 | 7.40321E-11 | 2.65542E-07 | 1.37121E-08 | 1.26846E-09 | 6.14064E-17 | 2.14562E-16 | 3.23326E-10 | 4.50642E-12 | 8.12109E-10 | 6.42875E-15 | 5.96659E-11 | 1.15773E-11 | 1.79101E-06 | 1.81023E-07 | 5.30946E-10 | 1.29311E-09 | 2.13742E-09 |
| rs1131596 | *SLC19A1* | 2.70491E-06 | 1.28647E-08 | 0.001962754 | 2.93666E-07 | 0.000157811 | 2.42345E-10 | 0.003463803 | 0.002157723 | 4.05232E-15 | 8.36885E-10 | 1.97806E-09 | 2.4473E-08 | 5.3838E-08 | 1.57283E-16 | 2.12237E-14 | 7.1283E-10 | 5.84025E-08 | 1.17944E-08 | 3.64222E-15 | 2.1325E-09 | 2.89188E-10 | 1.28584E-10 | 1.17655E-11 | 7.68181E-12 | 2.90232E-12 | 2.65177E-11 |
| rs1065852 | *CYP2D6* | 7.9987E-13 | 3.74076E-10 | 6.97242E-13 | 6.32361E-05 | 5.28012E-13 | 3.67193E-15 | 1.04013E-11 | 2.24704E-21 | 3.51771E-20 | 7.47719E-28 | 3.14824E-13 | 3.15194E-20 | 5.48596E-13 | 3.97653E-11 | 1.73102E-21 | 5.69691E-15 | 2.20988E-07 | 2.71341E-15 | 7.94219E-09 | 1.84875E-13 | 1.01798E-10 | 5.21409E-09 | 1.42331E-14 | 8.37999E-13 | 9.80429E-19 | 1.59508E-15 |

African Caribbeans in Barbados (ACB); the African Ancestry in Southwest USA (ASW); Esan in Nigeria (ESN); Gambian in Western Divisions, The Gambia (GWD); the Luhya in Webuye, Kenya (LWK); the Mende in Sierra Leone (MSL); the Yoruba in Ibadan, Nigeria (YRI); the Colombian in Medellin, Colombia (CLM); the Mexican Ancestry in Los Angeles, Colombia (MXL); the Peruvian in Lima, Peru (Peruvian in Lima, Peru); the Puerto Rican in Puerto Rico (PUR);the Chinese Dai in Xishuangbanna, China ( CDX); the Han Chinese in Bejing, China (CHB0; the Southern Han Chinese, China (CHS); the Japanese in Tokyo, Japan (JPT); the Kinh in Ho Chi Minh City, Vietnam (KHV); the Utah residents with Northern and Western European ancestry (CEU); the Finnish in Finland (FIN); the British in England and Scotland (GBR); the Iberian populations in Spain (IBS); the Toscani in Italy (TSI); the Bengali in Bangladesh (BEB); the Gujarati Indian in Houston, Texas (GIH); the Indian Telugu in the UK (ITU); the Punjabi in Lahore, Pakistan (PJL) and the Sri Lankan Tamil in the UK (STU).

p <0.05/(49*11) indicates statistical significance.
